# Supplementary material for: Transcriptional Profiling of Diabetic Neuropathy in the BKS db/db Mouse: A Model of Type 2 Diabetes
Source: PubMed Central journal article supplement — Diabetes. 2011 Jun 20;60(7):1981–9. doi: 10.2337/db10-1541 (PMC3121428; doi:10.2337/db10-1541), 2011-06-20
Supplement: supp_db10-1541_DB101541SupplementaryData.pdf [file supp_db10-1541_DB101541SupplementaryData.pdf]

SUPPLEMENTARY DATA

**Supplementary Table 1:** Gene Expression Levels Measured Using qRT-PCR and Microarrays

| <b>Gene Symbol</b> | <b>Entrez Gene ID</b> | <b>P-value qRT-PCR</b> | <b>FC qRT-PCR</b> | <b>P-value Microarrays</b> | <b>FC Microarrays</b> | <b>Correlation</b> |
|--------------------|-----------------------|------------------------|-------------------|----------------------------|-----------------------|--------------------|
| Tph2               | 216343                | 1.44E-04               | 143               | 4.34E-12                   | 69                    | 0.98               |
| Lipf               | 67717                 | 1.46E-02               | 138               | 1.84E-14                   | 61                    | 0.86               |
| Cpa2               | 232680                | 3.63E-02               | 26                | 7.82E-12                   | 34                    | 0.83               |
| Ucp1               | 22227                 | 4.43E-02               | 28                | 7.03E-08                   | 33                    | 0.91               |
| Oxtr               | 18430                 | 2.72E-03               | 100               | 5.55E-12                   | 31                    | 0.85               |

Fold change in expression between the two sample groups (*db/db* and *db/+*) and correlation in expression levels measured by qRT-PCR and microarrays. FC: fold change. P-value microarrays represents Intensity Based Moderated T-statistics (IBMT) p-value of differential expression.

SUPPLEMENTARY DATA

**Supplementary Table 2:** Regulated Pathways and Genes

| <b>Pathway</b>                   | <b>Gene Symbol</b> | <b>Entrez Gene ID</b> | <b>Direction of Regulation</b> | <b>P-value</b> | <b>Fold Change</b> |
|----------------------------------|--------------------|-----------------------|--------------------------------|----------------|--------------------|
| <b>Glycolysis</b>                | Fbp2               | 14120                 | up                             | 3.60E-03       | 3.72               |
|                                  | Akr1c13            | 27384                 | up                             | 8.71E-05       | 2.63               |
|                                  | Pfkl               | 18641                 | up                             | 5.24E-05       | 2.02               |
|                                  | Hk3                | 212032                | up                             | 1.02E-02       | 1.77               |
|                                  | Dlat               | 235339                | up                             | 1.89E-04       | 1.50               |
|                                  | Galm               | 319625                | up                             | 3.77E-04       | 1.47               |
|                                  | Aldh3b1            | 67689                 | up                             | 9.54E-03       | 1.42               |
|                                  | Adpgk              | 72141                 | up                             | 1.55E-03       | 1.30               |
|                                  | Tpi1               | 21991                 | up                             | 6.48E-05       | 1.27               |
|                                  | Dld                | 13382                 | up                             | 8.94E-03       | 1.21               |
|                                  | Aldoa              | 11674                 | up                             | 4.45E-03       | 1.13               |
|                                  | Akr1a4             | 58810                 | up                             | 7.94E-03       | 1.10               |
|                                  | Eno2               | 13807                 | down                           | 2.57E-04       | 2.86               |
|                                  | Ldhb               | 16832                 | down                           | 6.45E-04       | 1.98               |
| <b>TCA Cycle</b>                 | Idh3a              | 67834                 | up                             | 8.30E-04       | 1.49               |
|                                  | Cs                 | 12974                 | up                             | 4.07E-04       | 1.19               |
|                                  | Dlst               | 78920                 | up                             | 6.93E-03       | 1.19               |
|                                  | Sucla2             | 20916                 | up                             | 3.12E-03       | 1.17               |
|                                  | Mdh2               | 17448                 | up                             | 4.41E-03       | 1.11               |
|                                  | Mdh1               | 17449                 | up                             | 6.50E-03       | 1.10               |
| <b>Oxidative Phosphorylation</b> | Atp6v0d2           | 242341                | up                             | 2.87E-08       | 14.07              |
|                                  | Atp6v0a1           | 11975                 | up                             | 6.10E-08       | 2.66               |

SUPPLEMENTARY DATA

| Pathway                      | Gene Symbol | Entrez Gene ID | Direction of Regulation | P-value  | Fold Change |
|------------------------------|-------------|----------------|-------------------------|----------|-------------|
|                              | Atp6v1c2    | 68775          | up                      | 1.10E-03 | 1.93        |
|                              | Atp6v1b2    | 11966          | up                      | 2.16E-04 | 1.68        |
|                              | Atp6v1a     | 11964          | up                      | 5.43E-04 | 1.54        |
|                              | Cox10       | 70383          | up                      | 2.38E-03 | 1.45        |
|                              | Atp6v1h     | 108664         | up                      | 4.44E-03 | 1.32        |
|                              | Atp6v0e     | 11974          | up                      | 1.35E-05 | 1.25        |
|                              | Atp6v0a2    | 21871          | up                      | 1.18E-02 | 1.24        |
|                              | Atp6v1e1    | 11973          | up                      | 1.54E-03 | 1.22        |
|                              | Cox6a1      | 12861          | up                      | 1.69E-03 | 1.18        |
|                              | Cox5a       | 12858          | up                      | 9.89E-04 | 1.17        |
|                              | Ndufb3      | 66495          | up                      | 1.60E-03 | 1.16        |
|                              | Ndufb6      | 230075         | up                      | 1.17E-03 | 1.14        |
|                              | Cox6b1      | 110323         | up                      | 2.10E-04 | 1.13        |
|                              | Atp6v1g2    | 66237          | down                    | 3.45E-03 | 7.39        |
|                              | Atp5g1      | 11951          | down                    | 2.49E-03 | 1.89        |
|                              | Atp5e       | 67126          | down                    | 1.07E-02 | 1.09        |
| <b>Fatty Acid Metabolism</b> | Cpt1b       | 12895          | up                      | 2.30E-03 | 2.59        |
|                              | Acaa1b      | 235674         | up                      | 1.29E-03 | 2.50        |
|                              | Acs11       | 14081          | up                      | 5.41E-06 | 1.93        |
|                              | Acox1       | 11430          | up                      | 1.81E-06 | 1.66        |
|                              | Slc27a1     | 26457          | up                      | 6.89E-05 | 1.63        |
|                              | Acaa1a      | 113868         | up                      | 6.84E-04 | 1.51        |
|                              | Hadha       | 97212          | up                      | 4.82E-04 | 1.51        |

SUPPLEMENTARY DATA

| Pathway                        | Gene Symbol | Entrez Gene ID | Direction of Regulation | P-value  | Fold Change |
|--------------------------------|-------------|----------------|-------------------------|----------|-------------|
|                                | Acaa2       | 52538          | up                      | 2.65E-03 | 1.43        |
|                                | Acadm       | 11364          | up                      | 5.20E-05 | 1.33        |
|                                | Cpt1a       | 12894          | up                      | 5.20E-03 | 1.31        |
|                                | Acadl       | 11363          | up                      | 3.73E-04 | 1.22        |
|                                | Cpt1c       | 78070          | down                    | 4.38E-06 | 1.64        |
| <b>Glycerolipid Metabolism</b> | Lipf        | 67717          | up                      | 1.87E-14 | 60.63       |
|                                | Gla         | 11605          | up                      | 1.17E-04 | 2.56        |
|                                | Pnpla3      | 116939         | up                      | 3.14E-05 | 2.42        |
|                                | Mgll        | 23945          | up                      | 3.09E-06 | 2.30        |
|                                | Dgat2       | 67800          | up                      | 1.39E-05 | 2.01        |
|                                | Lipe        | 16890          | up                      | 8.11E-04 | 1.88        |
|                                | Gpd1        | 14555          | up                      | 1.81E-03 | 1.64        |
|                                | Lpl         | 16956          | up                      | 2.84E-06 | 1.49        |
|                                | Pnliprp2    | 18947          | up                      | 7.22E-03 | 1.36        |
|                                | Dgat1       | 13350          | up                      | 9.94E-03 | 1.33        |
|                                | Lycat       | 225010         | up                      | 4.35E-03 | 1.22        |
|                                | Agpat7      | 99010          | down                    | 8.85E-03 | 1.39        |
| <b>Lipid Transport</b>         | Apoc4       | 11425          | up                      | 5.75E-10 | 12.23       |
|                                | Apoc2       | 11813          | up                      | 2.59E-07 | 5.14        |
|                                | Gpihbp1     | 68453          | up                      | 1.62E-05 | 3.14        |
|                                | Cpt1b       | 12895          | up                      | 2.30E-03 | 2.59        |
|                                | Adfp        | 11520          | up                      | 4.38E-08 | 2.27        |
|                                | Atp10a      | 11982          | up                      | 3.44E-04 | 2.07        |

SUPPLEMENTARY DATA

| Pathway                        | Gene Symbol   | Entrez Gene ID | Direction of Regulation | P-value  | Fold Change |
|--------------------------------|---------------|----------------|-------------------------|----------|-------------|
|                                | Vldlr         | 22359          | up                      | 2.16E-07 | 1.83        |
|                                | Oprs1         | 18391          | up                      | 4.28E-04 | 1.77        |
|                                | Slc27a1       | 26457          | up                      | 6.89E-05 | 1.63        |
|                                | Apool         | 68117          | up                      | 1.18E-04 | 1.58        |
|                                | Cpt1a         | 12894          | up                      | 5.20E-03 | 1.31        |
|                                | Pltp          | 18830          | up                      | 4.10E-04 | 1.16        |
|                                | Atp8a2        | 50769          | down                    | 1.62E-03 | 4.25        |
|                                | Lcat          | 16816          | down                    | 2.53E-04 | 2.76        |
|                                | Osbp13        | 71720          | down                    | 1.13E-02 | 2.16        |
|                                | Abca2         | 11305          | down                    | 2.82E-03 | 1.41        |
| <b>Adipocytokine Signaling</b> | Npy           | 109648         | up                      | 4.21E-03 | 3.62        |
|                                | Lep           | 16846          | up                      | 3.83E-06 | 3.10        |
|                                | Cpt1b         | 12895          | up                      | 2.30E-03 | 2.59        |
|                                | Tnf- $\alpha$ | 21926          | up                      | 7.42E-03 | 2.06        |
|                                | Acs11         | 14081          | up                      | 5.41E-06 | 1.93        |
|                                | CD36          | 12491          | up                      | 7.38E-07 | 1.82        |
|                                | Ptpn11        | 19247          | up                      | 9.86E-05 | 1.53        |
|                                | Tnfrsf1b      | 21938          | up                      | 1.19E-02 | 1.52        |
|                                | Mtor          | 56717          | up                      | 1.67E-04 | 1.44        |
|                                | Cpt1a         | 12894          | up                      | 5.20E-03 | 1.31        |
|                                | Mapk10        | 26414          | down                    | 1.01E-02 | 15.96       |
|                                | Lepr          | 16847          | down                    | 5.64E-04 | 3.02        |
|                                | Camkk1        | 55984          | down                    | 1.29E-04 | 2.18        |

SUPPLEMENTARY DATA

| Pathway                       | Gene Symbol | Entrez Gene ID | Direction of Regulation | P-value  | Fold Change |
|-------------------------------|-------------|----------------|-------------------------|----------|-------------|
|                               | Akt3        | 23797          | down                    | 2.06E-04 | 1.78        |
|                               | Cpt1c       | 78070          | down                    | 4.38E-06 | 1.64        |
| <b>PPAR Signaling</b>         | Ucp1        | 22227          | up                      | 7.04E-08 | 33.15       |
|                               | Olr1        | 108078         | up                      | 3.64E-10 | 16.93       |
|                               | Aqp7        | 11832          | up                      | 2.58E-06 | 2.91        |
|                               | Cpt1b       | 12895          | up                      | 2.30E-03 | 2.59        |
|                               | Acaa1b      | 235674         | up                      | 1.29E-03 | 2.50        |
|                               | Angptl4     | 57875          | up                      | 3.86E-05 | 2.35        |
|                               | Acs11       | 14081          | up                      | 5.41E-06 | 1.93        |
|                               | CD36        | 12491          | up                      | 7.38E-07 | 1.82        |
|                               | Acox1       | 11430          | up                      | 1.81E-06 | 1.66        |
|                               | Slc27a1     | 26457          | up                      | 6.89E-05 | 1.63        |
|                               | Gyk         | 14933          | up                      | 8.21E-03 | 1.62        |
|                               | Pparg       | 19016          | up                      | 3.28E-04 | 1.61        |
|                               | Acaala      | 113868         | up                      | 6.84E-04 | 1.51        |
| Cpt1c                         | 78070       | down           | 4.38E-06                | 1.64     |             |
| <b>Neurotrophin Signaling</b> | Irak2       | 108960         | up                      | 2.65E-10 | 4.61        |
|                               | Pik3r5      | 320207         | up                      | 1.39E-04 | 3.05        |
|                               | Sort1       | 20661          | up                      | 1.43E-04 | 1.65        |
|                               | Ripk2       | 192656         | up                      | 4.43E-05 | 1.56        |
|                               | Mapk10      | 26414          | down                    | 1.01E-02 | 15.96       |
|                               | Ngfr        | 18053          | down                    | 1.08E-03 | 2.57        |
|                               | Ntrk3       | 18213          | down                    | 4.26E-03 | 2.10        |

SUPPLEMENTARY DATA

| Pathway             | Gene Symbol | Entrez Gene ID | Direction of Regulation | P-value  | Fold Change |
|---------------------|-------------|----------------|-------------------------|----------|-------------|
|                     | Ngfb        | 18049          | down                    | 6.04E-03 | 1.53        |
| <b>Axonogenesis</b> | Tnfrsf12a   | 27279          | up                      | 6.44E-05 | 3.03        |
|                     | Alcam       | 11658          | up                      | 1.82E-05 | 2.28        |
|                     | Cxcr4       | 12767          | up                      | 1.70E-03 | 1.75        |
|                     | Ptpn11      | 19247          | up                      | 9.86E-05 | 1.53        |
|                     | Nefm        | 18040          | down                    | 1.32E-03 | 23.62       |
|                     | Nefl        | 18039          | down                    | 1.91E-03 | 19.43       |
|                     | Pou4f2      | 18997          | down                    | 8.78E-03 | 8.79        |
|                     | Sema4f      | 20355          | down                    | 3.89E-03 | 8.47        |
|                     | Ptprz1      | 19283          | down                    | 7.97E-03 | 6.72        |
|                     | Gap43       | 14432          | down                    | 3.77E-03 | 4.70        |
|                     | Kif5c       | 16574          | down                    | 1.35E-03 | 4.43        |
|                     | L1cam       | 16728          | down                    | 2.52E-03 | 3.77        |
|                     | Slitrk5     | 75409          | down                    | 1.91E-03 | 3.48        |
|                     | Thy1        | 21838          | down                    | 1.68E-06 | 3.25        |
|                     | Rab3a       | 19339          | down                    | 4.20E-03 | 3.12        |
|                     | Mapt        | 17762          | down                    | 1.01E-03 | 2.74        |
|                     | Stxbp1      | 20910          | down                    | 1.95E-03 | 2.71        |
|                     | Ngfr        | 18053          | down                    | 1.08E-03 | 2.57        |
|                     | Myh10       | 77579          | down                    | 5.76E-07 | 2.44        |
|                     | Bmp7        | 12162          | down                    | 1.01E-04 | 2.33        |
| Gfra3               | 14587       | down           | 4.87E-03                | 2.13     |             |
| Ntrk3               | 18213       | down           | 4.26E-03                | 2.10     |             |

SUPPLEMENTARY DATA

| <b>Pathway</b>   | <b>Gene Symbol</b> | <b>Entrez Gene ID</b> | <b>Direction of Regulation</b> | <b>P-value</b> | <b>Fold Change</b> |
|------------------|--------------------|-----------------------|--------------------------------|----------------|--------------------|
|                  | S100b              | 20203                 | down                           | 1.34E-04       | 2.09               |
|                  | Plxnb1             | 235611                | down                           | 1.66E-03       | 1.99               |
|                  | Foxd1              | 15229                 | down                           | 1.39E-03       | 1.95               |
|                  | Etv1               | 14009                 | down                           | 2.52E-03       | 1.81               |
|                  | Tgfb2              | 21808                 | down                           | 3.03E-04       | 1.71               |
|                  | Amigo1             | 229715                | down                           | 9.10E-04       | 1.68               |
|                  | Limk1              | 16885                 | down                           | 3.47E-03       | 1.61               |
|                  | Fyn                | 14360                 | down                           | 1.09E-06       | 1.61               |
|                  | Ntng1              | 80883                 | down                           | 6.01E-04       | 1.59               |
|                  | Cdh4               | 12561                 | down                           | 6.01E-04       | 1.59               |
|                  | Ngfb               | 18049                 | down                           | 6.51E-03       | 1.56               |
|                  | Kif2a              | 16563                 | down                           | 6.04E-03       | 1.53               |
| <b>Apoptosis</b> | Brca1              | 12189                 | up                             | 1.90E-05       | 3.63               |
|                  | Hipk2              | 15258                 | up                             | 7.26E-07       | 3.41               |
|                  | Igfbp3             | 16009                 | up                             | 6.88E-07       | 3.21               |
|                  | Cd1d1              | 12479                 | up                             | 2.00E-08       | 2.91               |
|                  | Hipk1              | 15257                 | up                             | 1.68E-04       | 2.37               |
|                  | Tnfrsf10b          | 21933                 | up                             | 3.58E-05       | 2.21               |
|                  | Il1a               | 16175                 | up                             | 9.01E-03       | 2.14               |
|                  | Tnf- $\alpha$      | 21926                 | up                             | 7.42E-03       | 2.06               |
|                  | Ripk3              | 56532                 | up                             | 8.76E-03       | 2.05               |
|                  | Aifm2              | 71361                 | up                             | 4.46E-04       | 2.04               |
|                  | BCI2113            | 94044                 | up                             | 3.95E-06       | 1.97               |



SUPPLEMENTARY DATA

| <b>Pathway</b> | <b>Gene Symbol</b> | <b>Entrez Gene ID</b> | <b>Direction of Regulation</b> | <b>P-value</b> | <b>Fold Change</b> |
|----------------|--------------------|-----------------------|--------------------------------|----------------|--------------------|
|                | Casp8              | 12370                 | up                             | 1.93E-03       | 1.91               |
|                | Bcl2l10            | 12049                 | up                             | 1.01E-03       | 1.88               |
|                | Psen2              | 19165                 | up                             | 4.07E-05       | 1.62               |
|                | Ripk2              | 192656                | up                             | 4.43E-05       | 1.56               |
|                | Cebpb              | 12608                 | up                             | 1.78E-03       | 1.55               |
|                | Fas                | 14102                 | up                             | 8.80E-03       | 1.39               |
|                | Agtr1b             | 11608                 | down                           | 7.11E-06       | 4.38               |
|                | Mapk8ip1           | 19099                 | down                           | 3.16E-04       | 2.51               |
|                | Tgfb2              | 21808                 | down                           | 3.03E-04       | 1.71               |

Pathways and associated genes up- or down-regulated in the *db/db* samples. P-value represents Intensity Based Moderated T-statistics (IBMT) p value of differential expression.

SUPPLEMENTARY DATA

**Supplementary Table 3:** Expression Profile Clusters and Enrichment

| Expression Profile                                                                  | Number of Genes | Enriched Terms                                                                                                                                                      |
|-------------------------------------------------------------------------------------|-----------------|---------------------------------------------------------------------------------------------------------------------------------------------------------------------|
| 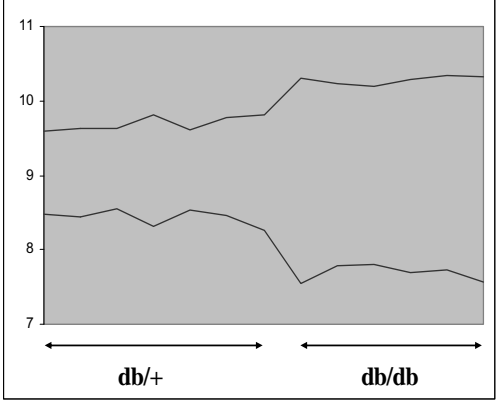   | 321             | Endoplasmic reticulum<br>Cytoplasm<br>Regulation of axonogenesis<br>Golgi apparatus<br>Regulation of actin cytoskeleton<br>Protein transport                        |
|   | 283             | Cytoplasm<br>Mitochondrion<br>Protein transport<br>Endoplasmic reticulum<br>Lipid transport<br>Lipid metabolic process                                              |
|  | 275             | Cytoplasm<br>Lipid metabolic process<br>Mitochondrion<br>Endoplasmic reticulum<br>Protein transport<br>Nervous system development<br>Carbohydrate metabolic process |

SUPPLEMENTARY DATA

| Expression Profile                                                                  | Number of Genes | Enriched Terms                                                                                                                                                                            |
|-------------------------------------------------------------------------------------|-----------------|-------------------------------------------------------------------------------------------------------------------------------------------------------------------------------------------|
| 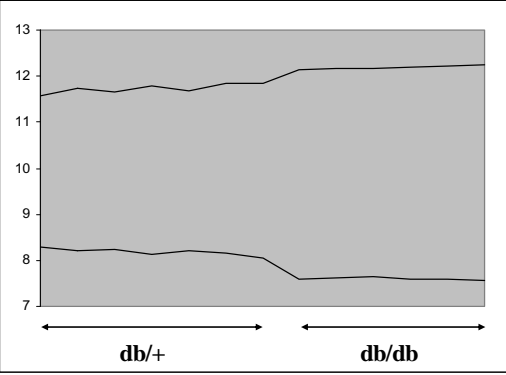   | 253             | <p>Cytoplasm</p> <p>Mitochondrion</p> <p>Golgi apparatus</p> <p>Oxidoreductase activity</p> <p>Endoplasmic reticulum</p> <p>Vesicle mediated transport</p> <p>Lipid metabolic process</p> |
|   | 260             | <p>Mitochondrion</p> <p>Cytoplasm</p> <p>Extracellular matrix</p> <p>Oxidoreductase activity</p> <p>Antioxidant activity</p>                                                              |
|  | 263             | <p>Regulation of transcription</p> <p>Metal ion binding</p> <p>Cell cycle</p> <p>Anatomical structure development</p> <p>RNA splicing</p> <p>Fat cell differentiation</p>                 |

SUPPLEMENTARY DATA

| Expression Profile                                                                  | Number of Genes | Enriched Terms                                                                                                                                                                                                                               |
|-------------------------------------------------------------------------------------|-----------------|----------------------------------------------------------------------------------------------------------------------------------------------------------------------------------------------------------------------------------------------|
| 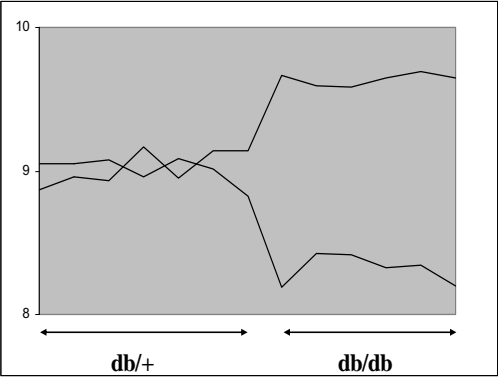   | 260             | <p>Cytoplasm</p> <p>RIG-I-like receptor signaling pathway</p> <p>Endoplasmic reticulum</p> <p>Vitamin transport</p> <p>Protein transport</p>                                                                                                 |
|   | 279             | <p>Cytoskeleton</p> <p>Cell division</p> <p>Negative regulation of transport</p> <p>Regulation of RAS protein signal transduction</p> <p>Neuromuscular junction development</p> <p>Response to DNA damage stimulus</p> <p>Focal adhesion</p> |
|  | 110             | <p>Cell division</p> <p>Mitotic cell cycle</p> <p>Microtubule cytoskeleton</p> <p>Response to stress</p> <p>Response to DNA damage</p> <p>Neuron projection development</p>                                                                  |

SUPPLEMENTARY DATA

| Expression Profile                                                                  | Number of Genes | Enriched Terms                                                                                                                                                                                 |
|-------------------------------------------------------------------------------------|-----------------|------------------------------------------------------------------------------------------------------------------------------------------------------------------------------------------------|
| 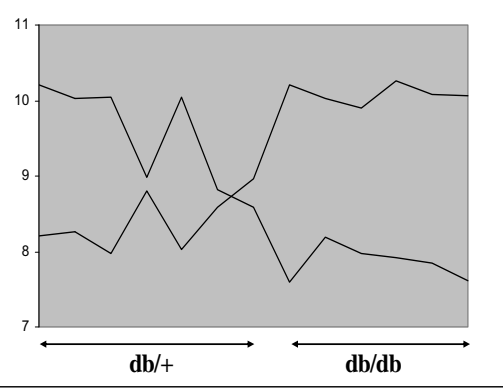   | 109             | <p>Cell junction</p> <p>Cell adhesion molecules (CAMs)</p> <p>Cell adhesion</p> <p>Synapse</p> <p>Neuron projection</p>                                                                        |
|   | 149             | <p>Metal ion transport</p> <p>Synaptic vesicle</p> <p>Voltage-gated ion channel activity</p> <p>Neurotransmitter transport</p> <p>Neuron projection development</p> <p>Cell-cell signaling</p> |
|  | 216             | <p>Dendrite</p> <p>Nucleus</p> <p>Cell-matrix adhesion</p> <p>Neuron projection</p> <p>Extracellular matrix</p> <p>Cellular response to stress</p> <p>Regulation of cell communication</p>     |

SUPPLEMENTARY DATA

| Expression Profile | Number of Genes | Enriched Terms                                                                                                                                                                                                                         |
|--------------------|-----------------|----------------------------------------------------------------------------------------------------------------------------------------------------------------------------------------------------------------------------------------|
|                    | 102             | <p>Ion transmembrane transporter activity</p> <p>Neuroactive ligand-receptor interaction</p> <p>Cell-cell signaling</p> <p>Transmission of nerve impulse</p> <p>Cell communication</p> <p>Neurotransmitter receptor activity</p>       |
|                    | 150             | <p>Extracellular region</p> <p>Carbohydrate catabolic process</p> <p>Positive regulation of cell cycle</p> <p>ATP synthesis coupled proton transport</p> <p>Alzheimer's disease</p> <p>Oxidative phosphorylation</p> <p>Glycolysis</p> |
|                    | 127             | <p>Plasma membrane</p> <p>Exocytosis</p> <p>Cell junction</p> <p>Synapse</p> <p>Neuroactive ligand-receptor interaction</p> <p>Axon</p>                                                                                                |

SUPPLEMENTARY DATA

| Expression Profile                                                                  | Number of Genes | Enriched Terms                                                                                                                                                                                                                                                          |
|-------------------------------------------------------------------------------------|-----------------|-------------------------------------------------------------------------------------------------------------------------------------------------------------------------------------------------------------------------------------------------------------------------|
| 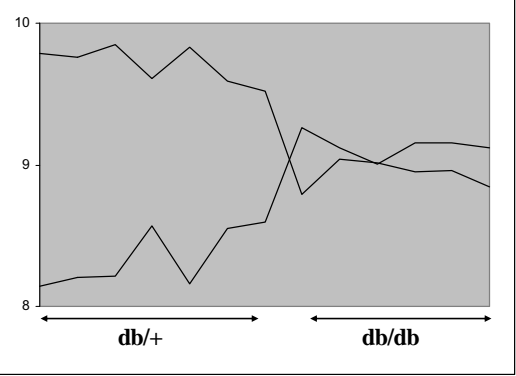   | 247             | <ul style="list-style-type: none"> <li>Regulation of cell cycle process</li> <li>Leukocyte chemotaxis</li> <li>Cytoplasm</li> <li>Cell adhesion</li> <li>Regulation of response to stress</li> <li>Glycan biosynthesis</li> <li>Positive regulation of NF-κB</li> </ul> |
|   | 117             | <ul style="list-style-type: none"> <li>Cell division</li> <li>Response to wounding</li> <li>Chemokine activity</li> <li>Inflammatory response</li> <li>Extracellular region</li> <li>Microtubule cytoskeleton</li> <li>Chemokine signaling pathway</li> </ul>           |
|  | 51              | <ul style="list-style-type: none"> <li>Neuron projection</li> <li>Neurofilament cytoskeleton</li> <li>Axon</li> <li>Amyotrophic lateral sclerosis (ALS)</li> <li>Extracellular region</li> <li>Vesicle mediated transport</li> </ul>                                    |

CRC expression profile clusters and enrichment. X axis: seven *db/+* and six *db/db* samples, y axis:  $\log_2$  expression level. Shown are mean expression levels for up-regulated and down-regulated genes in each cluster. Enriched terms with P value < 0.05 are listed for each cluster.

SUPPLEMENTARY DATA

**Supplementary Table 4:** Over-represented TFBS Matrix Families and Regulated TFs

| <b>TFBS Family</b> | <b>TF Gene Symbol</b> | <b>Entrez Gene ID</b> | <b>Direction of Regulation</b> | <b>P-value</b> | <b>Fold Change</b> |
|--------------------|-----------------------|-----------------------|--------------------------------|----------------|--------------------|
| HOMF               | Msx1                  | 17701                 | down                           | 9.05E-03       | 1.70               |
| ETSF               | Etv3                  | 27049                 | up                             | 6.13E-03       | 1.24               |
|                    | Etv1                  | 14009                 | down                           | 4.52E-03       | 1.81               |
|                    | Fli1                  | 14247                 | up                             | 1.72E-02       | 1.41               |
|                    | Sfpi1                 | 20375                 | up                             | 1.99E-02       | 1.74               |
| HOXF               | Hoxd1                 | 15429                 | down                           | 2.47E-02       | 20.12              |
|                    | Hoxb5                 | 15413                 | down                           | 1.00E-02       | 5.88               |
|                    | Hoxb6                 | 15414                 | down                           | 4.20E-03       | 5.48               |
|                    | Hoxb2                 | 103889                | down                           | 9.31E-04       | 2.19               |
|                    | Hoxb4                 | 15412                 | down                           | 1.11E-03       | 1.66               |
|                    | Hoxa5                 | 15402                 | down                           | 4.53E-03       | 1.51               |
| HBOX               | Meox1                 | 17285                 | down                           | 2.84E-03       | 1.42               |
| LHXF               | Isl1                  | 16392                 | down                           | 4.57E-03       | 33.44              |
|                    | Isl2                  | 104360                | down                           | 2.05E-02       | 19.55              |
| OCT1               | -                     | -                     | -                              | -              | -                  |

TFBS matrix families and TFs belonging to the matrix families, up- or down-regulated in the *db/db* samples. No TF from OCT1 family was differentially regulated in our data. P-value represents IBMT p value of differential expression.
